# Supplementary material for: Linking magnetic MII–[MV(CN)8] chains into 2D inorganic–organic hybrid materials
Source: Royal Society of Chemistry journal article supplement (doi:10.1039/c5ce00414d), 2015-01-01
Supplement: c5ce00414d1.pdf [file c5ce00414d1.pdf]

## Electronic Supplementary Information

# Linking magnetic $M^{II}$ - $[M^V(CN)_8]$ chains into 2D inorganic–organic hybrid materials

O. Stefańczyk,\* <sup>a,b,c</sup> A. M. Majcher,<sup>d</sup> M. Rams,<sup>d</sup> W. Nitek,<sup>a</sup> C. Mathonière,<sup>b,c</sup> and B. Sieklucka\*<sup>a</sup>

<sup>a</sup> Faculty of Chemistry, Jagiellonian University in Kraków, Ingardena 3, 30–060 Kraków, Poland.

<sup>b</sup> CNRS, ICMCB, UPR 9048, F–33600 Pessac, France.

<sup>c</sup> Univ. Bordeaux, ICMCB, UPR 9048, F–33600 Pessac, France.

<sup>d</sup> Institute of Physics, Jagiellonian University in Kraków, Łojasiewicza 11, 30–348 Kraków, Poland.

### Contents

**Table S1.** Results of continuous shape measures analysis for  $M^V$  centers.

**Table S2.** Results of continuous shape measures analysis for  $M^{II}$  centers.

**Figure S1.** IR spectra in full range, in the  $\nu(C\equiv N)$  region and in the fingerprint region for **1** - **3**.

**Figure S2.** ORTEP diagrams of asymmetric units of **2** and **3** with selected atoms labeling. Superimposed structural diagrams for **1** - **3**.

**Figure S3.** Local environments of the metal centers of **1** and other  $Co^{II}$ - $W^V$  systems.

**Figure S4.** Local environments of the metal centers of **2**, **3** and another  $Cu^{II}$ - $M^V$  system.

**Figure S5.** Crystal packing for **1** - **3** and other systems containing 3,2–chain entities.

**Figure S6.** The  $\chi_M'(f)$  and  $\chi_M''(f)$  curves for **1** as a function of the AC frequency measured in  $H_{dc} = 0, 0.5$  and  $1$  kOe ( $H_{ac} = 1$  Oe) at  $T = 1.8$  K.

**Figure S7.** The first derivative of magnetization vs. magnetic field plots for **1** - **3**.

**Table S1.** Results of continuous shape measures analysis for  $M^V$  centers.

| Compound | Geometry       | $S_{BTP}$ | $S_{SAPR}$ | $S_{TDD}$ |
|----------|----------------|-----------|------------|-----------|
|          | ideal BTP-8    | 0.000     | 2.262      | 2.709     |
|          | ideal SAPR-8   | 2.262     | 0.000      | 2.848     |
|          | ideal TDD-8    | 2.709     | 2.848      | 0.000     |
| 1        | $[W^I(CN)_8]$  | 2.064     | 2.275      | 0.345     |
| 2        | $[W^I(CN)_8]$  | 1.954     | 1.774      | 0.393     |
| 3        | $[Mo^I(CN)_8]$ | 1.966     | 1.674      | 0.497     |

$S_{BTP}$  – the shape measure relative to the bicapped trigonal prism;  $S_{SAPR}$  – the shape measure relative to the square antiprism;  $S_{TDD}$  – the shape measure relative to the triangular dodecahedron; smaller  $S$ -value reflect a better match with the ideal geometry ( $S = 0$ ).

**Table S2.** Results of continuous shape measures analysis for  $M^{II}$  centers.

| Compound | Geometry                   | $S_{OC}$ |
|----------|----------------------------|----------|
|          | OC-6                       | 0.000    |
| 1        | $[Co^2(NC)_2(DMF)_4]$      | 0.040    |
| 1        | $[Co^3(NC)_2(pyZ)(DMF)_3]$ | 0.345    |
| 2        | $[Cu^2(NC)_2(DMF)_4]$      | 0.185    |
| 2        | $[Cu^3(NC)_2(pyZ)(DMF)_3]$ | 0.831    |
| 3        | $[Cu^2(NC)_2(DMF)_4]$      | 0.426    |
| 3        | $[Cu^3(NC)_2(pyZ)(DMF)_3]$ | 0.843    |

$S_{OC}$  – the shape measure relative to the octahedron; smaller  $S$ -value reflect a better match with the ideal geometry ( $S = 0$ ).

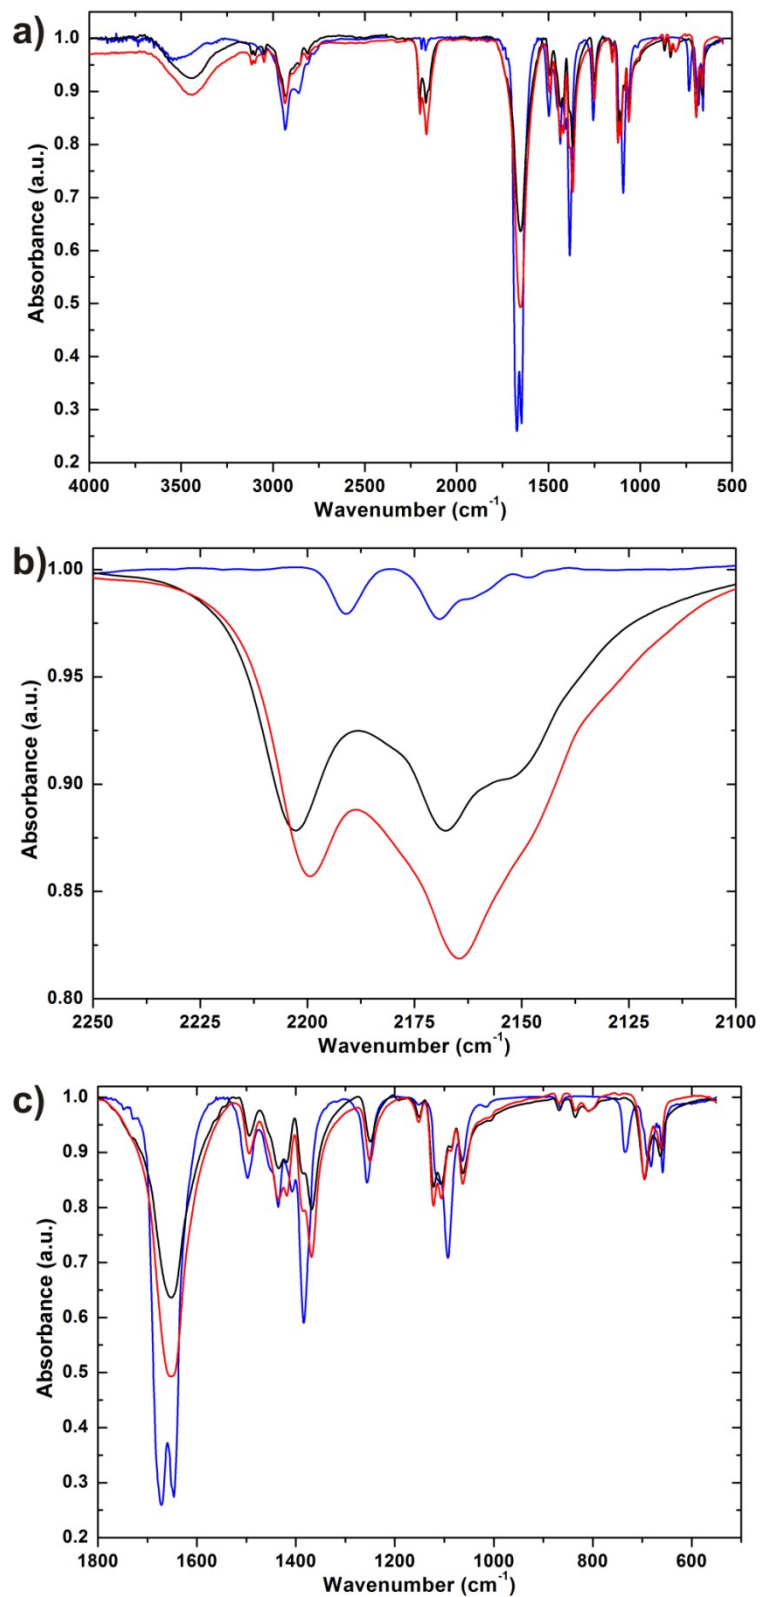

**Figure S1.** IR spectra in full range (4000 - 550 cm<sup>-1</sup>) (a), in the v(C≡N) region (2250 - 2000 cm<sup>-1</sup>) (b) and in the fingerprint region (1800 - 550 cm<sup>-1</sup>) (c) for **1** (blue), **2** (black) and **3** (red).

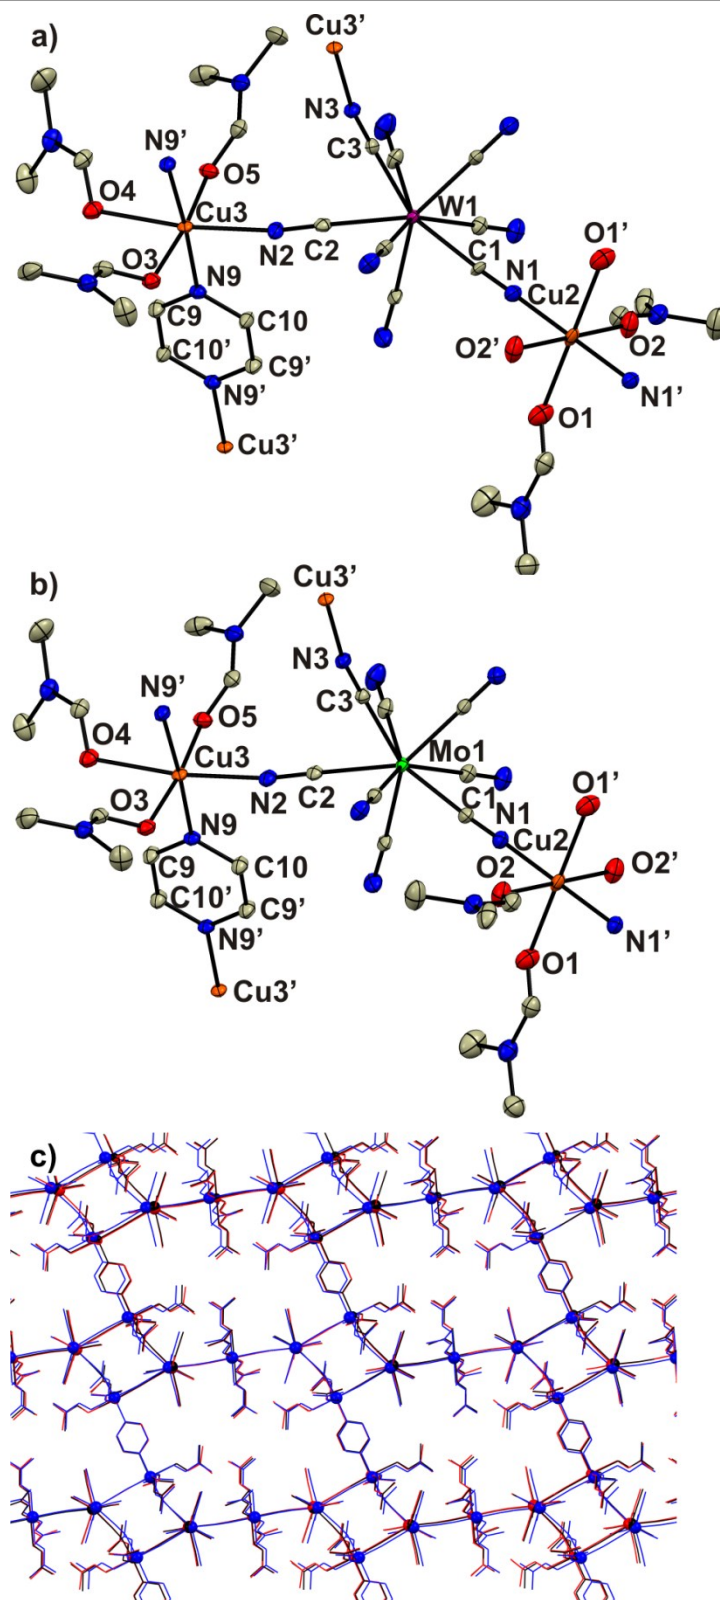

**Figure S2.** ORTEP diagrams of asymmetric units of **2** (a) and **3** (b) with selected atoms labeling. Colors used: C – gray, Co – yellow, Cu – orange, N – blue, Mo – green, O – red, W – purple. Thermal ellipsoids of 50% probability are shown. c) Superimposed structural diagrams for **1** (blue), **2** (black) and **3** (red).

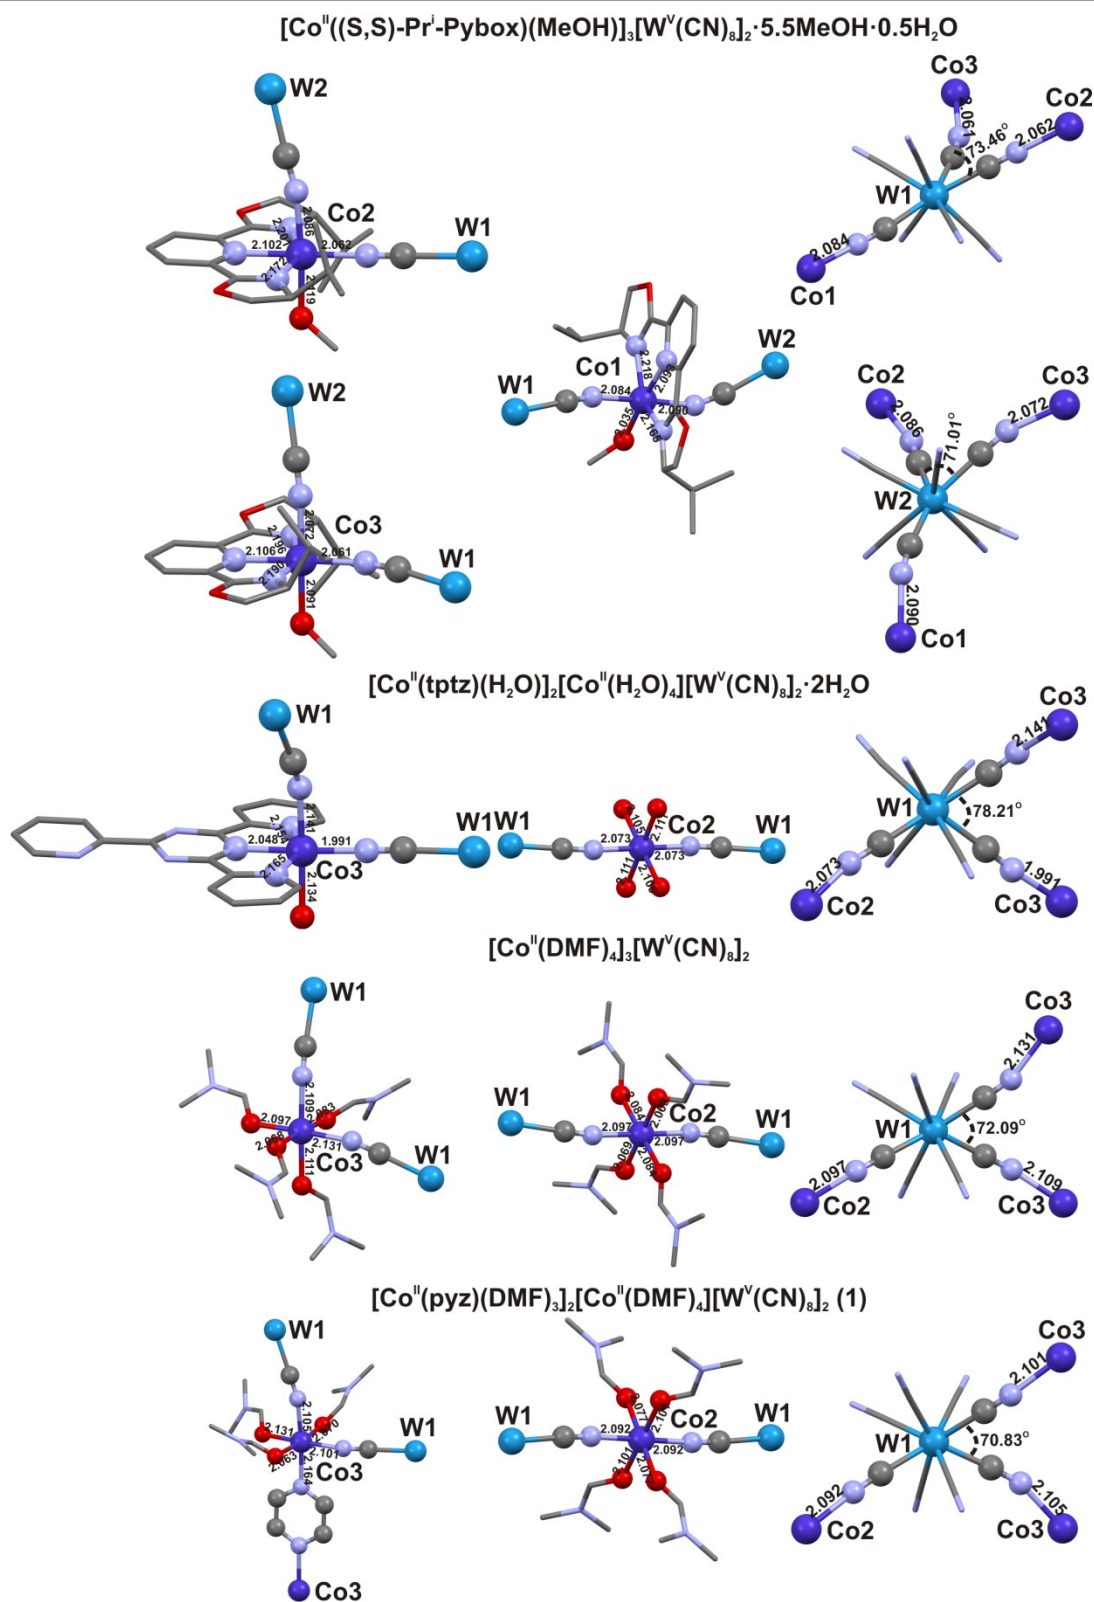

**Figure S3.** Local environments of the metal centers of **1** and other  $\text{Co}^{\text{II}}\text{-W}^{\text{V}}$  systems.

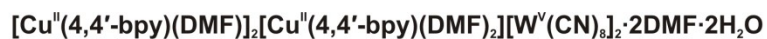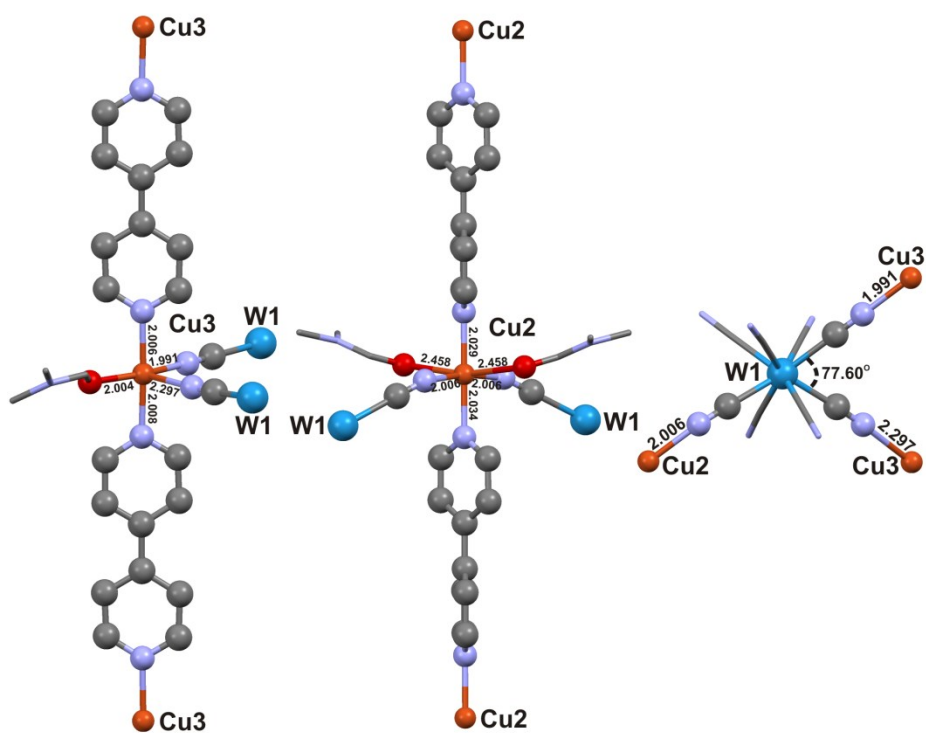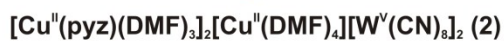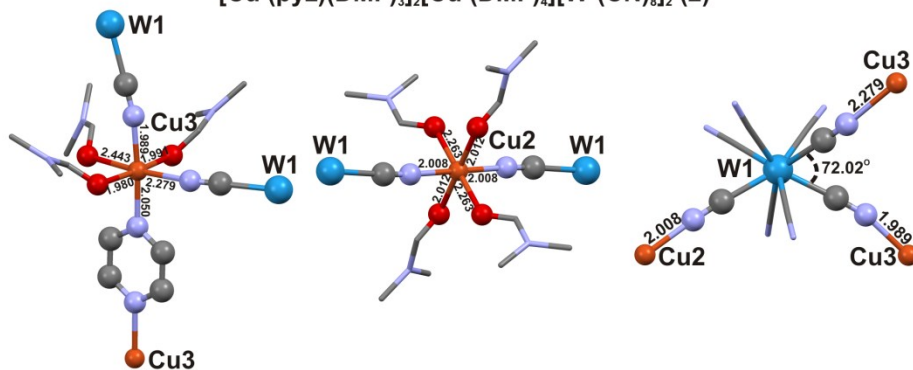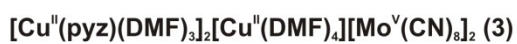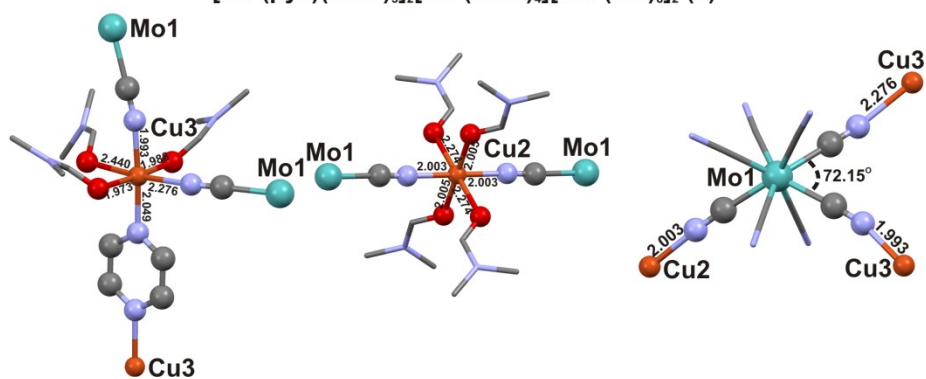

**Figure S4.** Local environments of the metal centers of **2**, **3** and another  $\text{Cu}^{\text{II}}\text{-M}^{\text{V}}$  system.



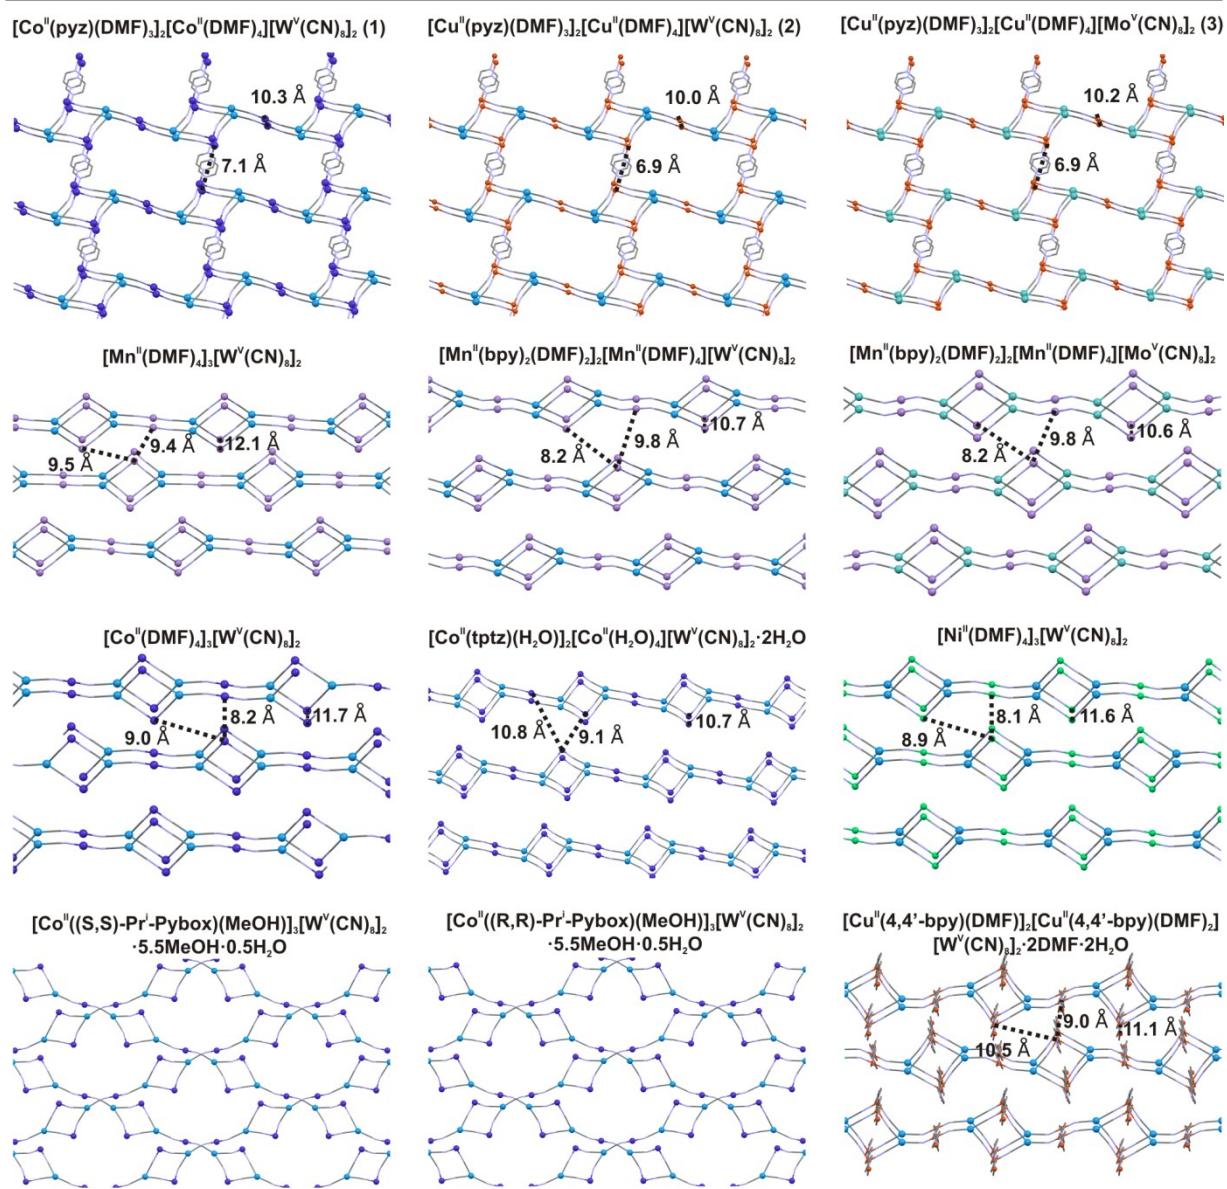

**Figure S5.** Crystal packing for **1** – **3** and other systems containing 3,2–chain entities.

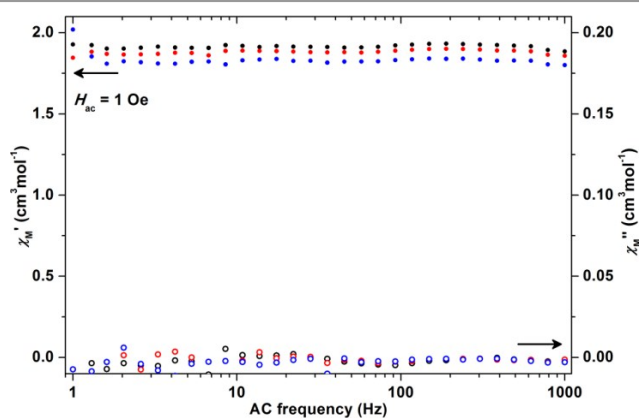

**Figure S6.** The  $\chi_M'(f)$  (full symbols) and  $\chi_M''(f)$  curves (open symbols) for **1** as a function of the AC frequency measured in  $H_{dc} = 0$  (black), 0.5 (red) and 1 kOe (blue) ( $H_{ac} = 1$  Oe) at  $T = 1.8$  K.

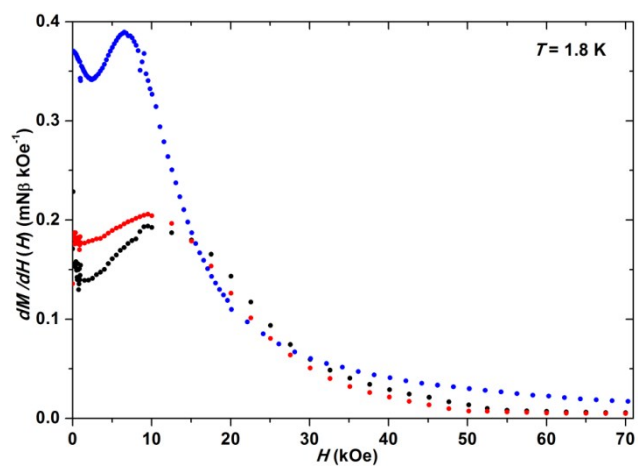

**Figure S7.** The first derivative of magnetization vs. magnetic field plots for **1** (blue), **2** (black) and **3** (red).
